# Supplementary material
Source: Research Square preprint supplement (doi:10.21203/rs.3.rs-8978914/v1)
Supplement: Supplementary file 1 [file f40e838d29a83533f383ad04.xlsx]

## Sheet: city_summary_afterzscore
Supplementary Table S1 | Selected global cities. This table lists the city name, country, continent, latitude, longitude, climate zone (arid, cold, temperate and tropical), precipitation regime (dry, seasonally dry and wet), median NDVI, and median ∆LST (difference in land surface temperature between urban green and grey spaces; °C) for 711 cities worldwide over the 5-year period 2018–2022.
City	Country	Continent	Latitude	Longitude	Climte zone	Precipitation regime	Median NDVI	Median ∆LST
Abidjan	Ivory Coast	Africa	5.32	-4.03	Tropical	Wet	0.34	-1.85
Bouake	Ivory Coast	Africa	7.68	-5.02	Tropical	Seasonally dry	0.42	-0.97
Algiers	Algeria	Africa	36.75	3.06	Temperate	Seasonally dry	0.35	-0.12
Luanda	Angola	Africa	-8.84	13.23	Arid	Dry	0.35	-0.54
Cotonou	Benin	Africa	6.37	2.43	Tropical	Seasonally dry	0.37	-1.59
Gaborone	Botswana	Africa	-24.66	25.91	Arid	Dry	0.3	-0.27
Bobo Dioulasso	Burkina Faso	Africa	11.18	-4.28	Tropical	Seasonally dry	0.29	-0.4
Ouagadougou	Burkina Faso	Africa	12.37	-1.53	Arid	Dry	0.19	0.45
Douala	Cameroon	Africa	4.05	9.7	Tropical	Wet	0.39	-1
Yaoundé	Cameroon	Africa	3.87	11.52	Tropical	Seasonally dry	0.34	0.01
Bangui	Central African Republic	Africa	4.37	18.56	Tropical	Seasonally dry	0.54	-1.97
Kinshasa	Congo (Democratic Republic of the)	Africa	-4.32	15.31	Tropical	Seasonally dry	0.51	-1.53
Mbuji-Mayi	Congo (Democratic Republic of the)	Africa	-6.22	23.48	Tropical	Seasonally dry	0.54	-1.17
Kolwezi	Congo (Democratic Republic of the)	Africa	-10.72	25.47	Tropical	Seasonally dry	0.27	-0.13
Alexandria	Egypt	Africa	31.2	29.89	Arid	Dry	0.2	-0.14
Suez	Egypt	Africa	29.97	32.55	Arid	Dry	0.24	1.01
Libreville	Gabon	Africa	0.39	9.45	Tropical	Wet	0.47	-1.75
Kumasi	Ghana	Africa	6.7	-1.63	Tropical	Seasonally dry	0.43	-1.23
Sekondi-Takoradi	Ghana	Africa	4.92	-1.76	Tropical	Wet	0.41	-1.23
Conakry	Guinea	Africa	9.51	-13.71	Tropical	Wet	0.34	-3.72
Monrovia	Liberia	Africa	6.31	-10.8	Tropical	Wet	0.44	-1.04
Zawiya	Libya	Africa	32.75	12.73	Arid	Dry	0.22	0.56
Tripoli	Libya	Africa	32.89	13.19	Arid	Dry	0.22	0.66
Misratah	Libya	Africa	32.38	15.09	Arid	Dry	0.16	0.46
Benghazi	Libya	Africa	32.12	20.07	Arid	Dry	0.15	0.78
Bamako	Mali	Africa	12.64	-8	Tropical	Seasonally dry	0.25	-0.35
Casablanca	Morocco	Africa	33.53	-7.58	Temperate	Seasonally dry	0.24	0.27
Marrakesh	Morocco	Africa	31.63	-8.01	Arid	Dry	0.24	1.35
Maputo	Mozambique	Africa	-25.97	32.58	Tropical	Seasonally dry	0.41	-0.6
Abeokuta	Nigeria	Africa	7.16	3.35	Tropical	Seasonally dry	0.32	-0.49
Ibafo	Nigeria	Africa	6.47	3.18	Tropical	Seasonally dry	0.43	-2.29
Ikorodu	Nigeria	Africa	6.62	3.51	Tropical	Seasonally dry	0.35	-2.02
Eti-osa	Nigeria	Africa	6.25	3.39	Tropical	Seasonally dry	0.37	-1.55
Ibadan	Nigeria	Africa	7.4	3.92	Tropical	Seasonally dry	0.32	-1.08
Ilorin	Nigeria	Africa	8.5	4.55	Tropical	Seasonally dry	0.26	-0.01
Akure	Nigeria	Africa	7.25	5.2	Tropical	Seasonally dry	0.39	-1.2
Benin City	Nigeria	Africa	6.33	5.62	Tropical	Seasonally dry	0.54	-2.38
Warri	Nigeria	Africa	5.52	5.75	Tropical	Wet	0.42	-2.32
Onitsha	Nigeria	Africa	6.17	6.78	Tropical	Seasonally dry	0.32	-1.93
Port Harcourt	Nigeria	Africa	4.82	7.03	Tropical	Wet	0.33	-2.07
Aba	Nigeria	Africa	5.12	7.37	Tropical	Wet	0.4	-1.45
Abuja	Nigeria	Africa	9.07	7.48	Tropical	Seasonally dry	0.27	0.1
Kaduna	Nigeria	Africa	10.52	7.43	Tropical	Seasonally dry	0.24	-0.65
Kano	Nigeria	Africa	12	8.52	Arid	Dry	0.21	-0.2
Jos	Nigeria	Africa	9.92	8.89	Tropical	Seasonally dry	0.27	-0.31
Pointe-Noire	Congo (Republic of the)	Africa	-4.8	11.85	Tropical	Seasonally dry	0.41	-1.79
Brazzaville	Congo (Republic of the)	Africa	-4.27	15.27	Tropical	Seasonally dry	0.45	-1.14
Kigali	Rwanda	Africa	-1.94	30.06	Tropical	Seasonally dry	0.44	-1.1
Dakar	Senegal	Africa	14.75	-17.4	Arid	Dry	0.22	0.17
Freetown	Sierra Leone	Africa	8.48	-13.23	Tropical	Wet	0.32	-1.74
Vereeniging	South Africa	Africa	-26.81	27.83	Temperate	Seasonally dry	0.31	-0.06
Polokwane	South Africa	Africa	-23.9	29.45	Arid	Dry	0.25	0.66
Durban	South Africa	Africa	-30.71	30.15	Temperate	Wet	0.52	-1.12
Cape Town	South Africa	Africa	-33.93	18.42	Temperate	Seasonally dry	0.4	-1.01
Gqeberha	South Africa	Africa	-33.96	25.6	Arid	Dry	0.41	-0.94
Bloemfontein	South Africa	Africa	-29.12	26.22	Arid	Dry	0.34	-0.33
Omdurman	Sudan	Africa	15.65	32.48	Arid	Dry	0.13	-1.25
Khartoum	Sudan	Africa	15.63	32.63	Arid	Dry	0.2	-0.34
Dar es Salaam	Tanzania	Africa	-6.82	39.28	Tropical	Seasonally dry	0.42	-1.38
Lomé	Togo	Africa	6.13	1.22	Tropical	Seasonally dry	0.35	-1.6
Tunis	Tunisia	Africa	36.81	10.18	Temperate	Seasonally dry	0.25	0.2
Sfax	Tunisia	Africa	34.74	10.76	Arid	Dry	0.15	1.31
Kampala	Uganda	Africa	0.31	32.58	Tropical	Wet	0.52	-1.74
Harare	Zimbabwe	Africa	-17.83	31.05	Temperate	Seasonally dry	0.36	-0.3
Buenos Aires	Argentina	Americas	-34.6	-58.38	Temperate	Wet	0.52	0.69
Córdoba	Argentina	Americas	-31.42	-64.18	Temperate	Seasonally dry	0.37	0.84
San Juan	Argentina	Americas	-31.53	-68.53	Arid	Dry	0.22	3.3
Godoy Cruz	Argentina	Americas	-32.92	-68.83	Arid	Dry	0.29	1.64
Nassau	Bahamas, The	Americas	25.08	-77.34	Tropical	Seasonally dry	0.54	-1.58
Santa Cruz de la Sierra	Bolivia	Americas	-17.8	-63.18	Tropical	Seasonally dry	0.44	-0.06
João Pessoa	Brazil	Americas	-7.12	-34.88	Tropical	Wet	0.57	-1.71
Olinda	Brazil	Americas	-8.05	-34.9	Tropical	Wet	0.57	-1.9
Natal	Brazil	Americas	-5.78	-35.2	Tropical	Seasonally dry	0.49	-2.54
Salvador	Brazil	Americas	-12.97	-38.48	Tropical	Wet	0.43	0.29
Fortaleza	Brazil	Americas	-3.73	-38.53	Tropical	Seasonally dry	0.46	-1.78
Feira de Santana	Brazil	Americas	-12.25	-38.95	Tropical	Seasonally dry	0.48	-1.23
Vitoria	Brazil	Americas	-20.29	-40.31	Tropical	Seasonally dry	0.54	-1.38
Vila Velha	Brazil	Americas	-20.34	-40.29	Tropical	Seasonally dry	0.55	-0.94
Juazeiro	Brazil	Americas	-9.38	-40.5	Arid	Dry	0.32	1.23
Teresina	Brazil	Americas	-5.09	-42.8	Tropical	Seasonally dry	0.47	-1.42
Sao Goncalo	Brazil	Americas	-22.83	-43.05	Tropical	Seasonally dry	0.59	-1.29
Montes Claros	Brazil	Americas	-16.73	-43.86	Tropical	Seasonally dry	0.38	-0.72
Belo Horizonte	Brazil	Americas	-19.92	-43.93	Tropical	Seasonally dry	0.44	-1.78
Taubaté	Brazil	Americas	-23.03	-45.56	Tropical	Seasonally dry	0.53	-1.26
Mongaguâ	Brazil	Americas	-24.09	-46.62	Tropical	Wet	0.54	-0.87
Sao Paulo	Brazil	Americas	-23.55	-46.63	Temperate	Wet	0.47	-2.07
Americana	Brazil	Americas	-22.91	-47.06	Tropical	Seasonally dry	0.47	-0.93
Ribeirão Preto	Brazil	Americas	-21.18	-47.81	Tropical	Seasonally dry	0.43	-0.69
Brasília	Brazil	Americas	-15.79	-47.88	Tropical	Seasonally dry	0.39	-0.84
Uberlândia	Brazil	Americas	-18.92	-48.29	Tropical	Seasonally dry	0.41	-0.47
Belém	Brazil	Americas	-1.37	-48.37	Tropical	Wet	0.49	-1.97
Anápolis	Brazil	Americas	-16.33	-48.95	Tropical	Seasonally dry	0.37	-0.4
Bauru	Brazil	Americas	-22.32	-49.06	Tropical	Seasonally dry	0.51	-1.13
Curitiba	Brazil	Americas	-25.43	-49.27	Temperate	Wet	0.48	-1.21
Goiânia	Brazil	Americas	-16.67	-49.25	Tropical	Seasonally dry	0.41	-0.78
São José do Rio Preto	Brazil	Americas	-20.81	-49.38	Tropical	Seasonally dry	0.43	-0.63
Canoas	Brazil	Americas	-29.92	-51.18	Temperate	Wet	0.55	-1.65
Campo Grande	Brazil	Americas	-20.48	-54.62	Tropical	Seasonally dry	0.49	-0.76
Várzea Grande	Brazil	Americas	-15.6	-56.1	Tropical	Seasonally dry	0.43	-0.88
Manaus	Brazil	Americas	-3.12	-60.02	Tropical	Wet	0.49	-1.99
Porto Velho	Brazil	Americas	-8.76	-63.9	Tropical	Wet	0.59	-3.96
Quebec City	Canada	Americas	46.81	-71.21	Cold	Wet	0.36	-2.61
Montreal	Canada	Americas	45.51	-73.56	Cold	Wet	0.46	-2.28
Ottawa	Canada	Americas	45.42	-75.7	Cold	Wet	0.51	-2.46
St. Catharines	Canada	Americas	43.18	-79.23	Cold	Wet	0.52	-2.03
Kitchener	Canada	Americas	43.42	-80.47	Cold	Wet	0.45	-2.36
Sudbury	Canada	Americas	46.49	-81.01	Cold	Wet	0.33	-1.51
London	Canada	Americas	42.98	-81.25	Cold	Wet	0.44	-2.16
Windsor	Canada	Americas	42.28	-83	Cold	Wet	0.4	-2
Winnipeg	Canada	Americas	49.88	-97.15	Cold	Wet	0.33	-0.87
Edmonton	Canada	Americas	53.53	-113.49	Cold	Wet	0.36	-1.63
Calgary	Canada	Americas	51.05	-114.07	Cold	Wet	0.29	-1.73
Vancouver	Canada	Americas	49.25	-123.1	Temperate	Wet	0.54	-2.4
Santiago	Chile	Americas	-33.44	-70.65	Temperate	Seasonally dry	0.31	1.15
Cúcuta	Colombia	Americas	7.89	-72.5	Tropical	Seasonally dry	0.46	-1.2
Compartir	Colombia	Americas	4.71	-74.07	Temperate	Wet	0.47	-4.31
Barranquilla	Colombia	Americas	10.98	-74.8	Arid	Dry	0.52	-2.93
Medellin	Colombia	Americas	6.23	-75.59	Tropical	Wet	0.56	-4.9
Cartagena	Colombia	Americas	10.4	-75.5	Tropical	Seasonally dry	0.44	-2.47
Heredia	Costa Rica	Americas	9.93	-84.08	Tropical	Wet	0.48	-1.66
Havana	Cuba	Americas	23.14	-82.36	Tropical	Wet	0.6	-1.76
Santo Domingo	Dominican Republic	Americas	18.47	-69.95	Tropical	Wet	0.55	-1.62
Santiago de los Caballeros	Dominican Republic	Americas	19.46	-70.69	Tropical	Seasonally dry	0.46	-0.44
Guayaquil	Ecuador	Americas	-2.19	-79.89	Tropical	Seasonally dry	0.58	-3.39
San Salvador	El Salvador	Americas	13.7	-89.19	Tropical	Seasonally dry	0.57	-2.87
Guatemala	Guatemala	Americas	14.61	-90.54	Temperate	Seasonally dry	0.42	-1.93
Port-au-Prince	Haiti	Americas	18.53	-72.33	Tropical	Seasonally dry	0.46	0.3
Tegucigalpa	Honduras	Americas	14.11	-87.2	Tropical	Seasonally dry	0.43	-1.15
San Pedro Sula	Honduras	Americas	15.5	-88.03	Tropical	Wet	0.56	-1.66
Kingston	Jamaica	Americas	17.97	-76.79	Tropical	Wet	0.56	-2.77
Managua	Nicaragua	Americas	12.14	-86.25	Tropical	Seasonally dry	0.48	-3.01
Panama City	Panama	Americas	8.98	-79.52	Tropical	Wet	0.59	-2.91
Balboa	Panama	Americas	8.88	-79.78	Tropical	Wet	0.49	-1.07
Asunción	Paraguay	Americas	-25.3	-57.63	Tropical	Wet	0.52	-0.8
Arequipa	Peru	Americas	-16.4	-71.53	Arid	Dry	0.28	-0.05
Lima	Peru	Americas	-12.06	-77.04	Arid	Dry	0.11	0.85
San Juan	Puerto Rico	Americas	18.38	-66.16	Tropical	Wet	0.63	-2.15
Ponce	Puerto Rico	Americas	18.01	-66.62	Tropical	Seasonally dry	0.48	-1.33
Guayana City	Venezuela	Americas	8.08	-62.96	Tropical	Seasonally dry	0.5	-2.05
Caracas	Venezuela	Americas	10.48	-66.9	Tropical	Seasonally dry	0.48	-0.65
Maracay	Venezuela	Americas	10.25	-67.6	Tropical	Seasonally dry	0.41	0.51
Valencia	Venezuela	Americas	10.18	-68	Tropical	Seasonally dry	0.4	-0.22
Barquisimeto	Venezuela	Americas	10.06	-69.33	Arid	Dry	0.34	0.95
San Francisco	Venezuela	Americas	10.63	-71.63	Arid	Dry	0.44	-1.65
Huntsville	United States	Americas	34.7	-86.64	Temperate	Wet	0.47	-1.53
Birmingham	United States	Americas	33.53	-86.8	Temperate	Wet	0.46	-1.4
Mobile	United States	Americas	30.68	-88.12	Temperate	Wet	0.49	-2.02
Little Rock	United States	Americas	34.73	-92.36	Temperate	Wet	0.49	-1.56
Fayetteville	United States	Americas	36.19	-94.16	Temperate	Wet	0.45	-1.13
Tucson	United States	Americas	32.3	-110.88	Arid	Dry	0.23	-0.62
Indio	United States	Americas	33.74	-116.37	Arid	Dry	0.23	0.69
Victorville	United States	Americas	34.53	-117.35	Arid	Dry	0.17	0.27
Lancaster	United States	Americas	34.65	-118.22	Arid	Dry	0.18	1.3
Bakersfield	United States	Americas	35.35	-119.04	Arid	Dry	0.3	-0.24
Fresno	United States	Americas	36.78	-119.79	Arid	Dry	0.3	-0.02
Merced	United States	Americas	37.31	-120.48	Arid	Dry	0.39	-0.61
Stockton	United States	Americas	37.98	-121.31	Temperate	Seasonally dry	0.37	-1.11
Sacramento	United States	Americas	38.57	-121.47	Temperate	Seasonally dry	0.37	-1.03
San Jose	United States	Americas	37.76	-122.44	Temperate	Seasonally dry	0.34	-2.02
Pueblo	United States	Americas	38.27	-104.61	Arid	Dry	0.24	-0.63
Colorado Springs	United States	Americas	38.87	-104.76	Cold	Wet	0.25	-0.75
Fort Collins	United States	Americas	40.55	-105.07	Arid	Dry	0.38	-0.47
New Haven	United States	Americas	41.31	-72.92	Cold	Wet	0.47	-2.21
Wilmington	United States	Americas	39.74	-75.54	Cold	Wet	0.49	-2.19
Port St. Lucie	United States	Americas	27.28	-80.39	Temperate	Wet	0.58	-1.69
Melbourne	United States	Americas	27.96	-80.66	Temperate	Wet	0.54	-1.4
Jacksonville	United States	Americas	30.33	-81.67	Temperate	Wet	0.52	-1.9
Cape Coral	United States	Americas	26.64	-82	Temperate	Wet	0.51	-1.99
Lakeland	United States	Americas	28.06	-81.95	Temperate	Wet	0.55	-1.26
Ocala	United States	Americas	29.18	-82.15	Temperate	Wet	0.53	-1.34
Port Charlotte	United States	Americas	26.99	-82.11	Temperate	Wet	0.56	-1.33
Sarasota	United States	Americas	27.34	-82.54	Temperate	Wet	0.56	-1.44
Tampa	United States	Americas	27.99	-82.44	Temperate	Wet	0.55	-1.96
Pensacola	United States	Americas	30.47	-87.25	Temperate	Wet	0.52	-1.76
Savannah	United States	Americas	32.03	-81.18	Temperate	Wet	0.5	-2.35
Augusta	United States	Americas	33.56	-82.14	Temperate	Wet	0.5	-2.02
Cedar Rapids	United States	Americas	41.97	-91.68	Cold	Wet	0.42	-1.4
Waterloo	United States	Americas	42.49	-92.35	Cold	Wet	0.48	-1.34
Des Moines	United States	Americas	41.57	-93.61	Cold	Wet	0.43	-1.65
Boise	United States	Americas	43.6	-116.23	Arid	Dry	0.33	-0.38
Rockford	United States	Americas	42.26	-89.06	Cold	Wet	0.4	-1.27
Swansea	United States	Americas	38.73	-90.13	Cold	Wet	0.43	-1.69
Silvis	United States	Americas	41.48	-90.49	Cold	Wet	0.46	-2.2
Fort Wayne	United States	Americas	41.09	-85.14	Cold	Wet	0.48	-1.66
New Albany	United States	Americas	38.4	-85.77	Cold	Wet	0.49	-2.19
Indianapolis	United States	Americas	39.78	-86.15	Cold	Wet	0.49	-2.22
South Bend	United States	Americas	41.68	-86.27	Cold	Wet	0.5	-1.53
Gary	United States	Americas	41.47	-87.32	Cold	Wet	0.44	-1.74
Evansville	United States	Americas	37.99	-87.53	Cold	Wet	0.41	-1.81
Olathe	United States	Americas	38.89	-94.69	Cold	Wet	0.4	-1.35
Topeka	United States	Americas	39.03	-95.7	Cold	Wet	0.37	-0.92
Manhattan	United States	Americas	39.03	-96.85	Cold	Wet	0.31	-1.08
Wichita	United States	Americas	37.69	-97.34	Cold	Wet	0.38	-0.71
Newport	United States	Americas	39.01	-84.59	Cold	Wet	0.55	-2.1
Lexington	United States	Americas	38.04	-84.46	Cold	Wet	0.54	-1.57
Louisville	United States	Americas	38.17	-85.65	Temperate	Wet	0.52	-2.48
Metairie	United States	Americas	30	-90.18	Temperate	Wet	0.51	-2.49
Baton Rouge	United States	Americas	30.44	-91.13	Temperate	Wet	0.55	-1.63
Lafayette	United States	Americas	30.21	-92.03	Temperate	Wet	0.51	-1.84
Shreveport	United States	Americas	32.47	-93.8	Temperate	Wet	0.5	-1.1
Boston	United States	Americas	42.32	-71.09	Cold	Wet	0.41	-2.25
Worcester	United States	Americas	42.27	-71.81	Cold	Wet	0.41	-1.81
Springfield	United States	Americas	42.12	-72.54	Cold	Wet	0.57	-2.52
Baltimore	United States	Americas	39.31	-76.61	Temperate	Wet	0.51	-2.38
Flint	United States	Americas	43.02	-83.69	Cold	Wet	0.48	-1.62
Bay City	United States	Americas	43.59	-83.89	Cold	Wet	0.42	-1.38
Lansing	United States	Americas	42.71	-84.56	Cold	Wet	0.45	-1.82
Kalamazoo	United States	Americas	42.27	-85.59	Cold	Wet	0.49	-1.49
Grand Rapids	United States	Americas	42.96	-85.66	Cold	Wet	0.48	-1.55
St. Louis	United States	Americas	38.64	-90.25	Cold	Wet	0.37	-1.5
Columbia	United States	Americas	38.95	-92.33	Cold	Wet	0.47	-2.3
Springfield	United States	Americas	37.19	-93.29	Cold	Wet	0.45	-1.63
Kansas City	United States	Americas	39.12	-94.55	Cold	Wet	0.4	-0.8
Billings	United States	Americas	45.79	-108.55	Arid	Dry	0.39	-1.48
Wilmington	United States	Americas	34.21	-77.89	Temperate	Wet	0.51	-1.75
Raleigh	United States	Americas	35.83	-78.64	Temperate	Wet	0.57	-1.9
Fayetteville	United States	Americas	35.09	-78.98	Temperate	Wet	0.52	-1.72
Winston-Salem	United States	Americas	35.99	-79.99	Temperate	Wet	0.52	-2.06
Charlotte	United States	Americas	35.21	-80.83	Temperate	Wet	0.53	-1.86
Hickory	United States	Americas	35.74	-81.32	Temperate	Wet	0.55	-2.4
Fargo	United States	Americas	46.87	-96.83	Cold	Wet	0.41	-1.5
Omaha	United States	Americas	41.26	-96.05	Cold	Wet	0.34	-1.1
Lincoln	United States	Americas	40.81	-96.68	Cold	Wet	0.33	-0.87
Gloucester City	United States	Americas	39.95	-75	Cold	Wet	0.5	-2.17
Albuquerque	United States	Americas	35.11	-106.65	Arid	Dry	0.24	-1.86
Las Vegas	United States	Americas	36.23	-115.27	Arid	Dry	0.16	-0.5
Reno	United States	Americas	39.53	-119.82	Arid	Dry	0.24	0.11
New York City	United States	Americas	40.95	-73.87	Cold	Wet	0.47	-2.22
Schenectady	United States	Americas	42.74	-73.79	Cold	Wet	0.55	-2.45
Nanuet	United States	Americas	41.1	-74.02	Cold	Wet	0.52	-2.71
Syracuse	United States	Americas	43.04	-76.14	Cold	Wet	0.56	-1.87
Rochester	United States	Americas	43.17	-77.62	Cold	Wet	0.52	-1.95
Buffalo	United States	Americas	42.9	-78.85	Cold	Wet	0.55	-2.93
Youngstown	United States	Americas	41.1	-80.65	Cold	Wet	0.59	-1.69
Cleveland	United States	Americas	41.48	-81.68	Cold	Wet	0.5	-2.65
Canton	United States	Americas	40.81	-81.37	Cold	Wet	0.57	-2.22
Akron	United States	Americas	41.08	-81.52	Cold	Wet	0.5	-1.77
Columbus	United States	Americas	39.99	-82.99	Cold	Wet	0.54	-2.43
Toledo	United States	Americas	41.66	-83.58	Cold	Wet	0.44	-1.85
Dayton	United States	Americas	39.78	-84.2	Cold	Wet	0.51	-2.03
Cincinnati	United States	Americas	39.14	-84.51	Cold	Wet	0.51	-2.22
Tulsa	United States	Americas	36.13	-95.9	Temperate	Wet	0.33	-1.22
Oklahoma City	United States	Americas	35.47	-97.51	Temperate	Wet	0.31	-1.02
Portland	United States	Americas	45.54	-122.65	Temperate	Seasonally dry	0.54	-2.81
Allentown	United States	Americas	40.6	-75.48	Cold	Wet	0.5	-2.04
Scranton	United States	Americas	41.4	-75.66	Cold	Wet	0.55	-2.8
Lancaster	United States	Americas	40.04	-76.3	Cold	Wet	0.49	-2.63
York	United States	Americas	39.97	-76.68	Cold	Wet	0.52	-2.81
Harrisburg	United States	Americas	40.28	-76.88	Cold	Wet	0.55	-2.69
Mechanicsburg	United States	Americas	40.2	-77.2	Cold	Wet	0.53	-2.38
Pittsburgh	United States	Americas	40.44	-79.98	Cold	Wet	0.49	-1.58
Providence	United States	Americas	41.82	-71.42	Cold	Wet	0.42	-1.72
Myrtle Beach	United States	Americas	33.71	-78.88	Temperate	Wet	0.53	-2.36
Florence	United States	Americas	34.18	-79.79	Temperate	Wet	0.52	-1.55
Charleston	United States	Americas	32.91	-80.07	Temperate	Wet	0.48	-2.18
Columbia	United States	Americas	34.01	-81.03	Temperate	Wet	0.53	-2.03
Rock Hill	United States	Americas	34.94	-81.02	Temperate	Wet	0.54	-2.39
Aiken	United States	Americas	33.02	-82.29	Temperate	Wet	0.56	-2.27
Greenville	United States	Americas	34.84	-82.36	Temperate	Wet	0.54	-2.11
Sioux Falls	United States	Americas	43.54	-96.73	Cold	Wet	0.34	-1.13
Johnson City	United States	Americas	36.34	-82.38	Temperate	Wet	0.59	-2.3
Knoxville	United States	Americas	35.97	-83.95	Temperate	Wet	0.5	-1.3
Nashville	United States	Americas	36.17	-86.78	Temperate	Wet	0.5	-2.02
Memphis	United States	Americas	35.11	-89.97	Temperate	Wet	0.49	-2.15
Port Arthur	United States	Americas	30.08	-94.15	Temperate	Wet	0.47	-1.8
Brownsville	United States	Americas	26	-97.46	Arid	Dry	0.41	-2.08
Corpus Christi	United States	Americas	27.73	-97.38	Temperate	Wet	0.38	-1.11
Austin	United States	Americas	30.3	-97.75	Temperate	Wet	0.37	-0.92
San Antonio	United States	Americas	29.46	-98.52	Temperate	Wet	0.36	-1.29
McAllen	United States	Americas	26.23	-98.25	Arid	Dry	0.41	-1.32
Laredo	United States	Americas	27.56	-99.49	Arid	Dry	0.3	-1.15
Amarillo	United States	Americas	35.2	-101.83	Arid	Dry	0.27	-0.02
Lubbock	United States	Americas	33.57	-101.89	Arid	Dry	0.26	-0.25
Midland	United States	Americas	32.02	-102.11	Arid	Dry	0.21	-0.5
Odessa	United States	Americas	31.88	-102.34	Arid	Dry	0.2	-0.77
El Paso	United States	Americas	31.85	-106.43	Arid	Dry	0.18	-0.51
Salt Lake City	United States	Americas	40.78	-111.93	Cold	Seasonally dry	0.35	-1.2
Norfolk	United States	Americas	36.89	-76.26	Temperate	Wet	0.49	-2.33
Hampton	United States	Americas	37.11	-76.52	Temperate	Wet	0.53	-2.28
Richmond	United States	Americas	37.58	-77.39	Temperate	Wet	0.51	-2.04
Alexandria	United States	Americas	38.84	-77.44	Cold	Wet	0.42	-1.55
Spokane	United States	Americas	47.67	-117.43	Arid	Dry	0.38	-0.17
Kennewick	United States	Americas	46.25	-119.13	Arid	Dry	0.37	-0.28
Yakima	United States	Americas	46.59	-120.55	Arid	Dry	0.41	-1.09
Seattle	United States	Americas	47.62	-122.32	Temperate	Seasonally dry	0.57	-2.39
Vancouver	United States	Americas	45.64	-122.6	Temperate	Seasonally dry	0.53	-2.85
Appleton	United States	Americas	44.51	-87.99	Cold	Wet	0.52	-1.85
Milwaukee	United States	Americas	43.06	-87.97	Cold	Wet	0.34	-2.02
Madison	United States	Americas	43.05	-89.33	Cold	Wet	0.42	-2.07
Eau Claire	United States	Americas	44.82	-91.49	Cold	Wet	0.48	-2.01
Cancun	Mexico	Americas	21.16	-86.85	Tropical	Seasonally dry	0.52	-1.74
Mérida	Mexico	Americas	20.97	-89.62	Tropical	Seasonally dry	0.42	-0.48
Villahermosa	Mexico	Americas	17.99	-92.93	Tropical	Wet	0.56	-1.67
Tuxtla Gutiérrez	Mexico	Americas	16.75	-93.12	Tropical	Seasonally dry	0.47	-0.65
Veracruz	Mexico	Americas	19.19	-96.15	Tropical	Seasonally dry	0.45	-1.09
Heroica Matamoros	Mexico	Americas	25.88	-97.5	Arid	Dry	0.38	-0.2
Tampico	Mexico	Americas	22.26	-97.87	Tropical	Seasonally dry	0.46	-1.96
Puebla	Mexico	Americas	19.03	-98.18	Temperate	Seasonally dry	0.3	-0.15
Reynosa	Mexico	Americas	26.09	-98.28	Arid	Dry	0.36	-0.29
Pachuca	Mexico	Americas	20.1	-98.75	Arid	Dry	0.21	-0.04
Mexico city	Mexico	Americas	19.43	-99.13	Temperate	Seasonally dry	0.28	-0.35
Acapulco	Mexico	Americas	16.86	-99.88	Tropical	Seasonally dry	0.53	-0.41
Monterrey	Mexico	Americas	25.67	-100.3	Arid	Dry	0.31	-0.52
Querétaro	Mexico	Americas	20.59	-100.39	Arid	Dry	0.28	0.33
Saltillo	Mexico	Americas	25.42	-100.99	Arid	Dry	0.21	0.17
San Luis Potosí	Mexico	Americas	22.15	-100.98	Arid	Dry	0.28	0.22
León	Mexico	Americas	21.12	-101.68	Arid	Dry	0.32	-1.37
Aguascalientes	Mexico	Americas	21.88	-102.3	Arid	Dry	0.26	0.57
Guadalajara	Mexico	Americas	20.68	-103.35	Temperate	Seasonally dry	0.3	-0.31
Torreón	Mexico	Americas	25.54	-103.41	Arid	Dry	0.25	0.51
Chihuahua	Mexico	Americas	28.64	-106.08	Arid	Dry	0.16	0.25
Juárez	Mexico	Americas	31.75	-106.49	Arid	Dry	0.19	0.5
Hermosillo	Mexico	Americas	29.1	-110.95	Arid	Dry	0.21	0.98
Mexicali	Mexico	Americas	32.66	-115.47	Arid	Dry	0.21	-0.17
Tijuana	Mexico	Americas	32.53	-117.03	Arid	Dry	0.21	0.1
Fuyang	China	Asia	32.89	115.81	Temperate	Seasonally dry	0.36	-0.18
Huaibei	China	Asia	33.96	116.8	Temperate	Seasonally dry	0.36	-0.47
Huainan	China	Asia	32.63	117.02	Temperate	Seasonally dry	0.4	-0.75
Hefei	China	Asia	31.82	117.23	Temperate	Wet	0.37	-0.82
Bengbu	China	Asia	32.92	117.39	Temperate	Seasonally dry	0.36	-0.44
Wuhu	China	Asia	31.35	118.43	Temperate	Wet	0.36	-0.81
Chongqing	China	Asia	29.56	106.55	Temperate	Seasonally dry	0.37	0.14
Fuzhou	China	Asia	26.07	119.3	Temperate	Wet	0.35	-0.87
Putian	China	Asia	25.45	119.01	Temperate	Seasonally dry	0.4	-0.38
Luozhou	China	Asia	25.87	119.46	Temperate	Wet	0.42	-1.19
Lanzhou	China	Asia	36.06	103.83	Arid	Dry	0.18	0.86
Nanning	China	Asia	22.82	108.33	Temperate	Seasonally dry	0.38	-1.16
Guiyang	China	Asia	26.65	106.63	Temperate	Seasonally dry	0.43	-0.81
Liusha	China	Asia	22.81	115.84	Temperate	Seasonally dry	0.36	-0.32
Shantou	China	Asia	23.35	116.68	Temperate	Seasonally dry	0.39	-1.55
Sanya	China	Asia	18.25	109.5	Tropical	Seasonally dry	0.5	-0.44
Haikou	China	Asia	20.02	110.35	Tropical	Seasonally dry	0.47	-1.32
Shijiazhuang	China	Asia	38.04	114.51	Arid	Dry	0.22	0.22
Xuanhua	China	Asia	40.75	114.72	Arid	Dry	0.24	0.34
Baoding	China	Asia	38.87	115.46	Arid	Dry	0.26	-0.29
Qinghe	China	Asia	37.07	115.66	Arid	Dry	0.32	0.3
Hengshui	China	Asia	37.74	115.67	Arid	Dry	0.35	-0.53
Zhuozhou	China	Asia	39.49	115.97	Cold	Seasonally dry	0.24	0.38
Renqiu	China	Asia	38.69	116.08	Arid	Dry	0.33	-0.29
Xian County	China	Asia	38.27	116.24	Arid	Dry	0.27	0.02
Langfang	China	Asia	39.54	116.68	Cold	Seasonally dry	0.31	-0.41
Wenan	China	Asia	38.94	116.46	Arid	Dry	0.31	-0.5
Bazhou	China	Asia	38.94	116.5	Cold	Seasonally dry	0.25	-1.68
Cangzhou	China	Asia	38.3	116.84	Arid	Dry	0.25	-0.35
Sanhe	China	Asia	40.02	117.08	Cold	Seasonally dry	0.25	0.1
Ningjin	China	Asia	37.79	116.84	Cold	Seasonally dry	0.25	-0.46
Huanghua	China	Asia	38.37	117.33	Cold	Seasonally dry	0.24	-0.19
Tangshan	China	Asia	39.63	118.17	Cold	Seasonally dry	0.19	-0.27
Qinhuangdao	China	Asia	39.89	119.52	Cold	Seasonally dry	0.23	-0.8
Qiqihar	China	Asia	47.35	123.92	Cold	Seasonally dry	0.22	-0.37
Daqing	China	Asia	46.59	125.1	Cold	Seasonally dry	0.23	-0.93
Harbin (Songbei)	China	Asia	45.83	126.6	Cold	Seasonally dry	0.27	-0.88
Harbin	China	Asia	45.76	126.64	Cold	Seasonally dry	0.27	-0.48
Jiamusi	China	Asia	46.8	130.32	Cold	Seasonally dry	0.28	-0.63
Luoyang	China	Asia	34.62	112.45	Cold	Seasonally dry	0.33	-0.41
Nanyang	China	Asia	33	112.53	Temperate	Seasonally dry	0.39	-0.32
Jiaozuo	China	Asia	35.22	113.24	Cold	Seasonally dry	0.3	0.44
Pingdingshan	China	Asia	33.74	113.3	Temperate	Seasonally dry	0.38	0.08
Zhengzhou	China	Asia	34.76	113.68	Cold	Seasonally dry	0.31	0.29
Xuchang	China	Asia	34.02	113.82	Temperate	Seasonally dry	0.36	-0.07
Xinxiang	China	Asia	35.33	113.88	Cold	Seasonally dry	0.31	0.01
Anyang	China	Asia	36.08	114.35	Cold	Seasonally dry	0.25	0.38
Kaifeng	China	Asia	34.8	114.35	Cold	Seasonally dry	0.29	0.42
Puyang	China	Asia	35.76	115.03	Cold	Seasonally dry	0.36	-0.32
Shangqiu	China	Asia	34.42	115.66	Cold	Seasonally dry	0.31	-0.35
Xiangyang	China	Asia	32.01	112.12	Temperate	Wet	0.38	-0.59
Wuhan (Jianghan)	China	Asia	30.11	113.63	Temperate	Wet	0.34	-1.12
Wuhan (Wuchang)	China	Asia	30.01	113.9	Temperate	Wet	0.34	-1.12
Huangshi	China	Asia	30.2	115.04	Temperate	Wet	0.36	-0.93
Changsha	China	Asia	28.23	112.94	Temperate	Wet	0.39	-0.81
Xiangtan	China	Asia	27.83	112.95	Temperate	Wet	0.43	-1.43
Wuhai	China	Asia	39.66	106.79	Arid	Dry	0.18	0.48
Baotou	China	Asia	40.62	109.95	Arid	Dry	0.21	0.1
Hohhot	China	Asia	40.84	111.75	Arid	Dry	0.24	0.18
Chifeng	China	Asia	42.26	118.89	Arid	Dry	0.2	0.53
Xuzhou	China	Asia	34.2	117.28	Cold	Seasonally dry	0.33	-1
Suqian	China	Asia	33.93	118.28	Cold	Seasonally dry	0.36	-0.88
Dachang	China	Asia	31.56	117.98	Temperate	Wet	0.37	-0.77
Huaiyin	China	Asia	33.58	119.03	Temperate	Seasonally dry	0.32	-0.07
Nanjing	China	Asia	32.06	118.78	Temperate	Wet	0.34	-0.72
Lianyungang	China	Asia	34.6	119.22	Cold	Seasonally dry	0.28	-0.05
Zhenjiang	China	Asia	32.19	119.42	Temperate	Wet	0.37	-0.74
Yangzhou	China	Asia	32.39	119.44	Temperate	Wet	0.37	-0.74
Nantong	China	Asia	31.98	120.89	Temperate	Wet	0.36	-0.98
Nanchang	China	Asia	28.09	115.37	Temperate	Wet	0.34	-1.28
Changchun	China	Asia	43.9	125.33	Cold	Seasonally dry	0.23	-0.29
Jilin	China	Asia	43.85	126.55	Cold	Seasonally dry	0.22	-0.46
Jinxi	China	Asia	40.71	120.84	Cold	Seasonally dry	0.23	-0.21
Jinzhou	China	Asia	41.13	121.15	Cold	Seasonally dry	0.22	0.02
Fuxin	China	Asia	42.02	121.67	Cold	Seasonally dry	0.2	0.94
Dalian	China	Asia	38.9	121.6	Cold	Seasonally dry	0.23	-0.36
Bayuquan	China	Asia	39.81	121.75	Cold	Seasonally dry	0.23	-0.28
Anshan	China	Asia	41.11	122.99	Cold	Seasonally dry	0.21	-0.27
Shenyang	China	Asia	41.8	123.43	Cold	Seasonally dry	0.19	-0.05
Yinchuan	China	Asia	38.49	106.23	Arid	Dry	0.23	0.62
Xining	China	Asia	36.62	101.78	Arid	Dry	0.27	-0.43
Baoji	China	Asia	34.36	107.24	Cold	Seasonally dry	0.34	-1.07
Yulin	China	Asia	38.29	109.73	Arid	Dry	0.26	0.71
Heze	China	Asia	35.23	115.48	Cold	Seasonally dry	0.32	-0.17
Shen County	China	Asia	36.33	115.62	Arid	Dry	0.37	0
Liaocheng	China	Asia	36.46	115.99	Cold	Seasonally dry	0.33	-0.1
Dezhou	China	Asia	37.44	116.36	Arid	Dry	0.35	-0.65
Jiaxiang	China	Asia	34.98	115.96	Cold	Seasonally dry	0.31	0.18
Pingyuan	China	Asia	36.86	115.98	Arid	Dry	0.35	-0.02
Jining	China	Asia	35.42	116.59	Cold	Seasonally dry	0.33	-0.17
Tai'an	China	Asia	36.2	117.09	Cold	Seasonally dry	0.31	-0.06
Jinan	China	Asia	36.67	117.02	Cold	Seasonally dry	0.34	-0.73
Zaozhuang	China	Asia	34.42	117.19	Cold	Seasonally dry	0.35	0.06
Laiwu	China	Asia	36.18	117.67	Cold	Seasonally dry	0.3	-0.19
Zouping	China	Asia	36.86	117.74	Cold	Seasonally dry	0.31	-0.61
Linyi	China	Asia	35.1	118.36	Cold	Seasonally dry	0.34	0.13
Binzhou	China	Asia	37.38	117.97	Cold	Seasonally dry	0.3	-0.86
Zibo	China	Asia	36.81	118.06	Cold	Seasonally dry	0.31	-0.7
Weifang	China	Asia	36.71	119.16	Cold	Seasonally dry	0.33	0.09
Dongying	China	Asia	37.43	118.67	Cold	Seasonally dry	0.25	-1.46
Rizhao	China	Asia	35.42	119.53	Cold	Seasonally dry	0.23	-0.05
Laizhou	China	Asia	37.18	119.93	Cold	Seasonally dry	0.25	-0.8
Lingshanwei	China	Asia	35.92	120.11	Cold	Seasonally dry	0.29	-0.45
Qingdao	China	Asia	36.07	120.38	Cold	Seasonally dry	0.26	-0.37
Yantai	China	Asia	37.46	121.45	Cold	Seasonally dry	0.27	-0.48
Weihai	China	Asia	37.51	122.12	Cold	Seasonally dry	0.29	-0.32
Yuncheng	China	Asia	35.03	111.01	Arid	Dry	0.32	-0.14
Linfen	China	Asia	36.09	111.52	Arid	Dry	0.29	0.24
Taiyuan	China	Asia	37.87	112.55	Arid	Dry	0.29	0.39
Datong	China	Asia	40.08	113.3	Arid	Dry	0.23	0.14
Yangquan	China	Asia	37.86	113.58	Cold	Seasonally dry	0.22	0.54
Chengdu	China	Asia	30.66	104.06	Temperate	Seasonally dry	0.33	-0.56
Tainan	Taiwan	Asia	22.98	120.18	Tropical	Seasonally dry	0.39	-0.87
Pingtung	Taiwan	Asia	22.68	120.49	Tropical	Wet	0.47	-0.85
Taichung	Taiwan	Asia	24.07	120.53	Temperate	Seasonally dry	0.39	-1.28
New taipei city	Taiwan	Asia	24.99	121.31	Temperate	Wet	0.56	-2.14
Jinghai town	China	Asia	38.93	116.92	Cold	Seasonally dry	0.22	-0.69
Kashi	China	Asia	39.47	75.99	Arid	Dry	0.2	0.08
Hotan	China	Asia	37.12	79.92	Arid	Dry	0.22	-0.86
Aksu	China	Asia	41.19	80.29	Arid	Dry	0.21	0.02
Yining	China	Asia	43.79	81.16	Arid	Dry	0.36	-0.11
Dushanzi	China	Asia	44.43	84.9	Arid	Dry	0.21	0.19
Karamay	China	Asia	45.58	84.89	Arid	Dry	0.22	0.45
Shihezi	China	Asia	44.31	86.08	Arid	Dry	0.3	-0.02
Urumqi	China	Asia	43.82	87.61	Arid	Dry	0.3	-0.04
Kunming	China	Asia	25.05	102.71	Temperate	Seasonally dry	0.35	-0.52
Huzhou	China	Asia	30.89	120.09	Temperate	Wet	0.36	-1.82
Choucheng	China	Asia	29.27	120.22	Temperate	Wet	0.36	-0.71
Hangzhou	China	Asia	30.27	120.15	Temperate	Wet	0.4	-1.15
Xiaoshan	China	Asia	30.16	120.26	Temperate	Wet	0.37	-1.14
Wenzhou	China	Asia	27.99	120.7	Temperate	Wet	0.37	-1.35
Jiaxing	China	Asia	30.75	120.76	Temperate	Wet	0.36	-0.91
Yuyao	China	Asia	30.05	121.15	Temperate	Wet	0.41	-1.9
Jiaojiang	China	Asia	28.66	121.42	Temperate	Wet	0.41	-1.08
Ningbo	China	Asia	29.86	121.62	Temperate	Wet	0.36	-1.26
Yerevan	Armenia	Asia	40.18	44.51	Arid	Dry	0.31	0.58
Sumqayit	Azerbaijan	Asia	40.59	49.67	Arid	Dry	0.2	-0.92
Baku	Azerbaijan	Asia	40.4	49.88	Arid	Dry	0.24	-0.37
Hamad Town	Bahrain	Asia	25.91	50.25	Arid	Dry	0.15	-0.37
Dhaka	Bangladesh	Asia	23.76	90.39	Tropical	Seasonally dry	0.36	-0.63
Bandar Seri Begawan	Brunei	Asia	4.74	114.69	Tropical	Wet	0.52	-1.12
Yangon	Burma	Asia	16.8	96.16	Tropical	Wet	0.48	-1.12
Mahaaungmye	Burma	Asia	21.98	96.08	Tropical	Seasonally dry	0.43	-1.63
Phnom Penh	Cambodia	Asia	11.57	104.92	Tropical	Seasonally dry	0.34	-0.84
Ahmedabad	India	Asia	23.02	72.57	Arid	Dry	0.31	-0.09
Dahej	India	Asia	21.72	72.63	Arid	Dry	0.27	0.02
Diwanman	India	Asia	19.23	72.63	Tropical	Seasonally dry	0.32	-1.14
Surat	India	Asia	21.17	72.83	Tropical	Seasonally dry	0.31	-0.43
Mumbai	India	Asia	19.08	72.88	Tropical	Seasonally dry	0.37	-0.76
Jodhpur	India	Asia	26.28	73.02	Arid	Dry	0.31	0.35
Kalyan	India	Asia	19.25	73.16	Tropical	Wet	0.37	-0.64
Vadodara	India	Asia	22.3	73.2	Tropical	Seasonally dry	0.36	0.31
Pune	India	Asia	18.52	73.86	Tropical	Seasonally dry	0.32	0.83
Nashik	India	Asia	20	73.79	Tropical	Seasonally dry	0.37	0.11
Jaipur	India	Asia	26.9	75.8	Arid	Dry	0.33	0.57
Ludhiana	India	Asia	30.91	75.85	Arid	Dry	0.35	-0.83
Indore	India	Asia	22.72	75.85	Tropical	Seasonally dry	0.38	-0.04
Aluva	India	Asia	10.05	76.32	Tropical	Wet	0.57	-1.26
Mysore	India	Asia	12.3	76.64	Arid	Dry	0.39	0.1
Chandigarh	India	Asia	30.75	76.78	Temperate	Seasonally dry	0.38	-0.06
Thiruvananthapuram	India	Asia	8.52	76.94	Tropical	Seasonally dry	0.53	-0.82
Coimbatore	India	Asia	11.02	76.96	Arid	Dry	0.38	0.64
Tirupur	India	Asia	11.11	77.34	Arid	Dry	0.35	0.15
Bhopal	India	Asia	23.26	77.41	Tropical	Seasonally dry	0.39	-0.18
Bengaluru	India	Asia	12.98	77.59	Arid	Dry	0.38	-0.12
Mathura	India	Asia	27.49	77.67	Arid	Dry	0.35	-0.05
Agra	India	Asia	27.18	78.02	Arid	Dry	0.37	-0.22
Aligarh	India	Asia	27.88	78.08	Arid	Dry	0.37	-0.56
Salem	India	Asia	11.65	78.15	Tropical	Seasonally dry	0.43	-0.36
Madurai	India	Asia	9.93	78.12	Tropical	Seasonally dry	0.43	-0.7
Gwalior	India	Asia	26.21	78.18	Arid	Dry	0.36	0.5
Hyderabad	India	Asia	17.36	78.47	Tropical	Seasonally dry	0.33	0.18
Tiruchirappalli	India	Asia	10.79	78.77	Tropical	Seasonally dry	0.44	-0.22
Nagpur	India	Asia	21.15	79.08	Tropical	Seasonally dry	0.36	0.54
Neyveli	India	Asia	11.61	79.5	Tropical	Seasonally dry	0.34	0.09
Kanpur	India	Asia	26.45	80.33	Temperate	Seasonally dry	0.35	-0.33
Chennai	India	Asia	13.08	80.28	Tropical	Seasonally dry	0.42	-0.82
Hanumanpet	India	Asia	16.52	80.63	Tropical	Seasonally dry	0.43	-0.96
Lucknow	India	Asia	26.85	80.95	Temperate	Seasonally dry	0.36	-0.02
Bhilai	India	Asia	21.21	81.38	Tropical	Seasonally dry	0.33	0.01
Raipur	India	Asia	21.24	81.63	Tropical	Seasonally dry	0.31	0.34
Jamshedpur	India	Asia	22.79	86.18	Tropical	Seasonally dry	0.37	-0.15
Dhanbad	India	Asia	23.8	86.43	Tropical	Seasonally dry	0.34	0.43
Kolkata	India	Asia	22.57	88.37	Tropical	Seasonally dry	0.45	-0.84
Medan	Indonesia	Asia	3.59	98.67	Tropical	Wet	0.54	-2.95
Padang	Indonesia	Asia	-0.95	100.35	Tropical	Wet	0.59	-1.99
Pekanbaru	Indonesia	Asia	0.51	101.45	Tropical	Wet	0.57	-2.6
Jambi	Indonesia	Asia	-1.59	103.61	Tropical	Wet	0.62	-3.03
Batam	Indonesia	Asia	0.98	103.91	Tropical	Wet	0.46	-1.84
Palembang	Indonesia	Asia	-2.99	104.76	Tropical	Wet	0.52	-1.69
Bandar Lampung	Indonesia	Asia	-5.45	105.27	Tropical	Wet	0.54	-1.71
Bandung	Indonesia	Asia	-6.91	107.61	Tropical	Wet	0.45	-2.45
Umbulharjo	Indonesia	Asia	-7.8	110.36	Tropical	Wet	0.57	-1.7
Semarang	Indonesia	Asia	-6.99	110.42	Tropical	Wet	0.54	-2.13
Surakarta	Indonesia	Asia	-7.57	110.82	Tropical	Wet	0.48	-1.13
Malang	Indonesia	Asia	-7.98	112.62	Tropical	Wet	0.54	-1.5
Mojokerto	Indonesia	Asia	-7.25	112.74	Tropical	Seasonally dry	0.41	-1.52
Banjarmasin	Indonesia	Asia	-3.32	114.59	Tropical	Wet	0.58	-2.74
Denpasar	Indonesia	Asia	-8.65	115.22	Tropical	Wet	0.53	-1.65
North Balikpapan	Indonesia	Asia	-1.23	116.75	Tropical	Wet	0.54	-2.29
Samarinda	Indonesia	Asia	-0.5	117.14	Tropical	Wet	0.6	-2.13
Makassar	Indonesia	Asia	-5.16	119.44	Tropical	Wet	0.47	-2.67
Ahwaz	Iran	Asia	31.3	48.68	Arid	Dry	0.16	1.04
Tehran	Iran	Asia	35.69	51.39	Temperate	Seasonally dry	0.24	1.93
Isfahan	Iran	Asia	32.64	51.67	Arid	Dry	0.22	2.43
Shiraz	Iran	Asia	29.61	52.54	Arid	Dry	0.17	2.83
Mashhad	Iran	Asia	36.33	59.54	Arid	Dry	0.2	0.89
Kirkuk	Iraq	Asia	35.46	44.39	Arid	Dry	0.15	2.24
Baghdad	Iraq	Asia	33.32	44.37	Arid	Dry	0.2	0.67
Kut	Iraq	Asia	32.51	45.68	Arid	Dry	0.19	-0.14
Al Amarah	Iraq	Asia	31.83	47.15	Arid	Dry	0.16	0.3
Basra	Iraq	Asia	30.52	47.81	Arid	Dry	0.16	-0.66
Beersheva	Israel	Asia	31.26	34.8	Arid	Dry	0.15	1.37
Tel Aviv-Yafo	Israel	Asia	32.08	34.78	Temperate	Seasonally dry	0.28	1.05
Fukuoka	Japan	Asia	33.59	130.4	Temperate	Wet	0.38	-1.43
Himeji	Japan	Asia	34.72	134.87	Temperate	Wet	0.34	-1.82
Osaka	Japan	Asia	34.69	135.5	Temperate	Wet	0.36	-2.4
Nagoya	Japan	Asia	35.3	136.8	Temperate	Wet	0.36	-2.53
Maebashi	Japan	Asia	36.3	139.11	Temperate	Seasonally dry	0.4	-1.11
Miyagino ward	Japan	Asia	38.27	140.87	Temperate	Wet	0.38	-3.45
Sapporo	Japan	Asia	43.06	141.35	Cold	Wet	0.44	-3.4
Aqaba	Jordan	Asia	29.53	35.01	Arid	Dry	0.07	-0.95
Atyrau	Kazakhstan	Asia	47.12	51.88	Arid	Dry	0.16	0.44
Aktobe	Kazakhstan	Asia	50.28	57.23	Arid	Dry	0.25	0.4
Shymkent	Kazakhstan	Asia	42.32	69.6	Cold	Seasonally dry	0.23	0.74
Taraz	Kazakhstan	Asia	42.9	71.37	Arid	Dry	0.29	1.48
Astana	Kazakhstan	Asia	51.15	71.42	Arid	Dry	0.34	-0.08
Ekibastuz	Kazakhstan	Asia	51.67	75.37	Arid	Dry	0.2	2.17
Pavlodar	Kazakhstan	Asia	52.3	76.95	Arid	Dry	0.35	1.23
Almaty	Kazakhstan	Asia	43.24	76.92	Arid	Dry	0.34	-0.12
Semey	Kazakhstan	Asia	50.43	80.27	Arid	Dry	0.32	0.78
Daegu	Korea, South	Asia	35.87	128.6	Cold	Seasonally dry	0.3	-0.56
Kuwait City	Kuwait	Asia	29.37	47.98	Arid	Dry	0.15	1
Bishkek	Kyrgyzstan	Asia	42.87	74.61	Arid	Dry	0.35	-0.01
Vientiane	Laos	Asia	17.98	102.63	Tropical	Seasonally dry	0.4	-0.6
Georgtown	Malaysia	Asia	5.41	100.33	Tropical	Wet	0.49	-2.04
Alor Setar	Malaysia	Asia	6.12	100.37	Tropical	Wet	0.5	-1.42
Bukit Mertajam	Malaysia	Asia	5.37	100.46	Tropical	Wet	0.47	-2.43
Sungai Petani	Malaysia	Asia	5.65	100.5	Tropical	Wet	0.58	-2.89
Ipoh	Malaysia	Asia	4.6	101.08	Tropical	Wet	0.51	-3.05
Seremban	Malaysia	Asia	2.72	101.94	Tropical	Wet	0.47	-2.62
Melacca City	Malaysia	Asia	1.97	102.01	Tropical	Wet	0.53	-1.7
Kota Bharu	Malaysia	Asia	6.13	102.25	Tropical	Wet	0.51	-2.49
Kuala Nerus Town	Malaysia	Asia	5.37	103.1	Tropical	Wet	0.53	-1.43
Taman Megah	Malaysia	Asia	1.85	102.94	Tropical	Wet	0.71	-7.8
Kuala Terengganu	Malaysia	Asia	5.33	103.14	Tropical	Wet	0.56	-1.76
Kuantan	Malaysia	Asia	3.82	103.33	Tropical	Wet	0.55	-2.62
Johor Bahru	Malaysia	Asia	1.46	103.76	Tropical	Wet	0.56	-2.81
Kota Kinabalu	Malaysia	Asia	5.98	116.07	Tropical	Wet	0.6	-2.69
Ulan Bator	Mongolia	Asia	47.92	106.92	Cold	Seasonally dry	0.18	-0.84
Karachi	Pakistan	Asia	24.86	67.01	Arid	Dry	0.23	0.58
Multan	Pakistan	Asia	30.2	71.47	Arid	Dry	0.33	-1.22
Peshawar	Pakistan	Asia	34.01	71.57	Arid	Dry	0.29	0.29
Faisalabad	Pakistan	Asia	31.42	73.09	Arid	Dry	0.29	-0.29
Rawalpindi	Pakistan	Asia	33.6	73.03	Temperate	Seasonally dry	0.29	0.49
Lahore	Pakistan	Asia	31.55	74.34	Arid	Dry	0.32	-0.37
Gujranwala	Pakistan	Asia	32.16	74.19	Arid	Dry	0.34	-0.65
Cebu City	Philippines	Asia	10.33	123.93	Tropical	Wet	0.56	-2.19
Doha	Qatar	Asia	25.29	51.53	Arid	Dry	0.16	-0.62
Jeddah	Saudi Arabia	Asia	21.54	39.17	Arid	Dry	0.09	1.21
Riyadh	Saudi Arabia	Asia	24.63	46.72	Arid	Dry	0.16	-0.35
Al Ahsa	Saudi Arabia	Asia	25.38	49.6	Arid	Dry	0.11	0.3
Dammam	Saudi Arabia	Asia	26.43	50.1	Arid	Dry	0.19	-0.29
Singapore	Singapore	Asia	1.3	103.8	Tropical	Wet	0.52	-1.73
Colombo	Sri Lanka	Asia	6.93	79.84	Tropical	Wet	0.51	-1.04
Damascus	Syria	Asia	33.51	36.29	Arid	Dry	0.2	1.92
Chiang Mai	Thailand	Asia	18.8	99	Tropical	Seasonally dry	0.47	-0.96
Hat Yai	Thailand	Asia	7.02	100.47	Tropical	Seasonally dry	0.56	-1.4
Si Racha	Thailand	Asia	13.05	100.93	Tropical	Seasonally dry	0.43	-1.69
Pattaya	Thailand	Asia	12.94	100.89	Tropical	Seasonally dry	0.45	-0.71
Chon Buri	Thailand	Asia	13.36	100.99	Tropical	Seasonally dry	0.41	-0.97
Rayong	Thailand	Asia	12.67	101.28	Tropical	Seasonally dry	0.44	-0.86
Bo win	Thailand	Asia	13.01	101.14	Tropical	Seasonally dry	0.42	-0.99
Nakhon Ratchasima	Thailand	Asia	14.98	102.1	Tropical	Seasonally dry	0.44	-0.38
İzmir	Turkey	Asia	38.42	27.14	Temperate	Seasonally dry	0.28	-0.66
Istanbul	Turkey	Asia	41.03	28.86	Temperate	Seasonally dry	0.42	-1.93
Gebze	Turkey	Asia	40.89	29.19	Temperate	Seasonally dry	0.38	-1.55
Konya	Turkey	Asia	37.87	32.48	Arid	Dry	0.19	1.89
Ankara	Turkey	Asia	39.93	32.85	Arid	Dry	0.26	0.41
Gaziantep	Turkey	Asia	37.06	37.38	Temperate	Seasonally dry	0.26	0.86
Ashgabat	Turkmenistan	Asia	37.94	58.38	Arid	Dry	0.23	0.85
Sharjah	United Arab Emirates	Asia	25.36	55.39	Arid	Dry	0.23	-2.03
Samarkand	Uzbekistan	Asia	39.65	66.98	Arid	Dry	0.26	1.36
Tashkent	Uzbekistan	Asia	41.31	69.28	Temperate	Seasonally dry	0.33	-0.01
Namangan	Uzbekistan	Asia	41	71.67	Arid	Dry	0.29	0.27
Fergana	Uzbekistan	Asia	40.39	71.79	Arid	Dry	0.27	1.3
Andijon	Uzbekistan	Asia	40.78	72.33	Arid	Dry	0.27	-0.13
Da Nang	Vietnam	Asia	16.07	108.22	Tropical	Wet	0.45	-1.41
Ramallah	West Bank	Asia	31.9	35.2	Temperate	Seasonally dry	0.21	1.4
Vienna	Austria	Europe	48.21	16.37	Cold	Wet	0.47	-0.68
Minsk	Belarus	Europe	53.9	27.57	Cold	Wet	0.5	-1.64
Kortrijk	Belgium	Europe	50.83	3.27	Temperate	Wet	0.53	-1.61
Antwerp	Belgium	Europe	51.22	4.4	Temperate	Wet	0.56	-2.03
Brussels	Belgium	Europe	50.85	4.35	Temperate	Wet	0.54	-1.5
Sofia	Bulgaria	Europe	42.7	23.33	Cold	Wet	0.41	-0.48
Zagreb	Croatia	Europe	45.81	15.98	Cold	Wet	0.53	-1.2
Prague	Czechia	Europe	50.09	14.42	Cold	Wet	0.51	-1.15
Copenhagen	Denmark	Europe	55.68	12.57	Cold	Wet	0.5	-1.39
Helsinki	Finland	Europe	60.17	24.94	Cold	Wet	0.4	-1.57
Lens	France	Europe	50.43	2.83	Temperate	Wet	0.52	-1.09
Perpignan	France	Europe	42.7	2.9	Arid	Dry	0.41	-0.27
Lille	France	Europe	50.63	3.06	Temperate	Wet	0.51	-1.4
Montpellier	France	Europe	43.61	3.88	Temperate	Seasonally dry	0.43	-0.48
Lyon	France	Europe	45.76	4.84	Temperate	Wet	0.46	-1.12
Marseille	France	Europe	43.44	5.38	Temperate	Seasonally dry	0.44	-0.97
Nice	France	Europe	43.58	7.12	Temperate	Seasonally dry	0.51	-0.54
Toulouse	France	Europe	43.6	1.44	Temperate	Wet	0.47	-1.12
Paris	France	Europe	48.86	2.35	Temperate	Wet	0.47	-0.91
Bordeaux	France	Europe	44.84	-0.58	Temperate	Wet	0.51	-0.76
Essen	Germany	Europe	51.45	7.01	Temperate	Wet	0.51	-1.19
Mannheim	Germany	Europe	49.49	8.47	Temperate	Wet	0.44	-0.74
Frankfurt am Main	Germany	Europe	50.11	8.68	Temperate	Wet	0.5	-1.22
Hamburg	Germany	Europe	53.55	10	Temperate	Wet	0.57	-1.04
Fürth	Germany	Europe	49.45	11.08	Cold	Wet	0.48	-0.83
Munich	Germany	Europe	48.14	11.58	Cold	Wet	0.43	-0.41
Dresden	Germany	Europe	51.05	13.74	Cold	Wet	0.45	-0.43
Berlin	Germany	Europe	52.52	13.41	Cold	Wet	0.46	-0.67
Thessaloniki	Greece	Europe	40.64	22.93	Arid	Dry	0.4	0.03
Athens	Greece	Europe	37.98	23.73	Temperate	Seasonally dry	0.3	1.03
Budapest	Hungary	Europe	47.49	19.05	Cold	Wet	0.45	-0.64
Dublin	Ireland	Europe	53.35	-6.26	Temperate	Wet	0.57	-1.26
Turin	Italy	Europe	45.08	7.68	Temperate	Wet	0.48	-1.59
Milan	Italy	Europe	45.47	9.19	Temperate	Wet	0.46	-0.69
Bergamo	Italy	Europe	45.7	9.67	Temperate	Wet	0.48	-0.63
Padua	Italy	Europe	45.42	11.87	Temperate	Wet	0.47	-0.93
rome	Italy	Europe	41.89	12.48	Temperate	Seasonally dry	0.49	-0.24
Marsala	Italy	Europe	37.8	12.43	Temperate	Seasonally dry	0.38	-0.23
Naples	Italy	Europe	40.83	14.25	Temperate	Seasonally dry	0.47	-1.78
Bari	Italy	Europe	41.13	16.87	Arid	Dry	0.37	0.32
Rotterdam	Netherlands	Europe	51.92	4.48	Temperate	Wet	0.53	-2.14
Amsterdam	Netherlands	Europe	52.37	4.89	Temperate	Wet	0.55	-1.92
Oslo	Norway	Europe	59.91	10.74	Cold	Wet	0.52	-1.15
Poznań	Poland	Europe	52.41	16.93	Cold	Wet	0.46	-0.94
Gdynia	Poland	Europe	54.35	18.65	Cold	Wet	0.49	-1.1
Bytom	Poland	Europe	50.3	18.95	Cold	Wet	0.43	-0.84
Kraków	Poland	Europe	50.06	19.94	Cold	Wet	0.5	-0.51
Warsaw	Poland	Europe	52.23	21.01	Cold	Wet	0.49	-0.91
Lublin	Poland	Europe	51.25	22.57	Cold	Wet	0.54	-1.7
Porto	Portugal	Europe	41.16	-8.62	Temperate	Seasonally dry	0.51	-1.42
Lisbon	Portugal	Europe	38.73	-9.15	Temperate	Seasonally dry	0.39	-1
Bucharest	Romania	Europe	44.43	26.1	Cold	Wet	0.49	-1.92
Saint Petersburg	Russia	Europe	59.94	30.31	Cold	Wet	0.51	-2.54
Moscow	Russia	Europe	55.76	37.62	Cold	Wet	0.52	-2.43
Stary Oskol	Russia	Europe	51.3	37.83	Cold	Wet	0.42	-1.66
Krasnodar	Russia	Europe	45.03	38.97	Cold	Wet	0.45	-1
Semiluki	Russia	Europe	51.68	39.03	Cold	Wet	0.48	-0.89
Voronezh	Russia	Europe	51.65	39.41	Cold	Wet	0.48	-1.14
Lipetsk	Russia	Europe	52.62	39.6	Cold	Wet	0.48	-2
Rostov-on-Don	Russia	Europe	47.22	39.71	Cold	Wet	0.44	-0.62
Volgograd	Russia	Europe	48.71	44.51	Arid	Dry	0.37	-0.39
Volzhsky	Russia	Europe	48.81	44.74	Arid	Dry	0.39	0.01
Kaspiysk	Russia	Europe	42.97	47.48	Arid	Dry	0.3	-0.62
Kazan	Russia	Europe	55.8	49.11	Cold	Wet	0.33	-1.97
Samara	Russia	Europe	53.2	50.14	Cold	Wet	0.39	-1.29
Novotroitsk	Russia	Europe	51.2	58.31	Arid	Dry	0.3	-0.29
Chelyabinsk	Russia	Europe	55.15	61.38	Cold	Wet	0.36	-0.81
Omsk	Russia	Europe	54.98	73.37	Cold	Wet	0.47	-0.92
Novosibirsk	Russia	Europe	55.05	82.95	Cold	Wet	0.45	-1.01
Krasnoyarsk	Russia	Europe	56.01	92.87	Cold	Wet	0.32	-0.64
Ulan-Ude	Russia	Europe	51.83	107.6	Cold	Seasonally dry	0.24	-0.4
Barcelona	Spain	Europe	41.38	2.18	Temperate	Seasonally dry	0.4	-1.21
Alicante	Spain	Europe	38.35	-0.48	Arid	Dry	0.28	0.21
Valladolid	Spain	Europe	41.65	-4.72	Arid	Dry	0.32	-0.3
Valencia	Spain	Europe	39.47	-0.38	Arid	Dry	0.35	-0.95
Torrevieja	Spain	Europe	37.87	-0.78	Arid	Dry	0.28	-0.17
Elche	Spain	Europe	38.27	-0.7	Arid	Dry	0.27	-0.59
Zaragoza	Spain	Europe	41.65	-0.88	Arid	Dry	0.28	-0.1
Murcia	Spain	Europe	37.99	-1.13	Arid	Dry	0.3	-0.5
Gothenburg	Sweden	Europe	57.71	11.97	Cold	Wet	0.41	-1.3
Stockholm	Sweden	Europe	59.33	18.07	Cold	Wet	0.53	-1.24
Kyiv	Ukraine	Europe	50.45	30.52	Cold	Wet	0.45	-1.05
Odesa	Ukraine	Europe	46.48	30.73	Arid	Dry	0.48	-0.83
Mykolaiv	Ukraine	Europe	46.98	32	Arid	Dry	0.46	-0.22
Kryvyi Rih	Ukraine	Europe	47.91	33.39	Cold	Wet	0.4	-0.22
Sevastopol	Ukraine	Europe	44.61	33.52	Arid	Dry	0.44	0.46
Simferopol	Ukraine	Europe	44.95	34.1	Arid	Dry	0.41	0.22
Dnipro	Ukraine	Europe	48.47	35.04	Cold	Wet	0.5	-1.58
Zaporizhzhia	Ukraine	Europe	47.85	35.12	Arid	Dry	0.45	-0.14
Kharkiv	Ukraine	Europe	49.99	36.23	Cold	Wet	0.49	-1.29
Donetsk	Ukraine	Europe	48	37.81	Cold	Wet	0.42	-0.08
Lviv	Ukraine	Europe	49.84	24.03	Cold	Wet	0.62	-2.05
Glasgow	United Kingdom	Europe	55.86	-4.25	Temperate	Wet	0.55	-1.64
London	United Kingdom	Europe	51.51	-0.13	Temperate	Wet	0.57	-2.4
Sheffield	United Kingdom	Europe	53.38	-1.47	Temperate	Wet	0.6	-2.01
Sunderland	United Kingdom	Europe	55.01	-1.44	Temperate	Wet	0.53	-1.39
Leeds	United Kingdom	Europe	53.8	-1.54	Temperate	Wet	0.58	-1.7
Birmingham	United Kingdom	Europe	52.48	-1.9	Temperate	Wet	0.57	-1.9
Manchester	United Kingdom	Europe	53.48	-2.25	Temperate	Wet	0.59	-1.52
Liverpool	United Kingdom	Europe	53.41	-2.98	Temperate	Wet	0.51	-1.38
Perth	Australia	Oceania	-31.96	115.86	Temperate	Seasonally dry	0.38	0.15
Adelaide	Australia	Oceania	-34.93	138.6	Arid	Dry	0.39	-0.86
Melbourne	Australia	Oceania	-37.81	144.96	Temperate	Wet	0.43	-0.65
Townsville	Australia	Oceania	-19.45	146.58	Tropical	Seasonally dry	0.42	-0.56
Sydney	Australia	Oceania	-33.87	151.21	Temperate	Wet	0.55	-1.43
Brisbane	Australia	Oceania	-27.47	153.03	Temperate	Wet	0.53	-0.87
Gold Coast	Australia	Oceania	-27.97	153.41	Temperate	Wet	0.58	-2.15
